# Supplementary material
Source: PubMed Central journal article supplement (PMC8379691)
Supplement: mmc1.pdf [file mmc1.pdf]

**iScience, Volume 24**

**Supplemental information**

**Sensitive extraction-free SARS-CoV-2 RNA virus  
detection using a chelating resin**

**Bin Guan, Karen M. Frank, José O. Maldonado, Margaret Beach, Eileen Pelayo, Blake M. Warner, and Robert B. Hufnagel**

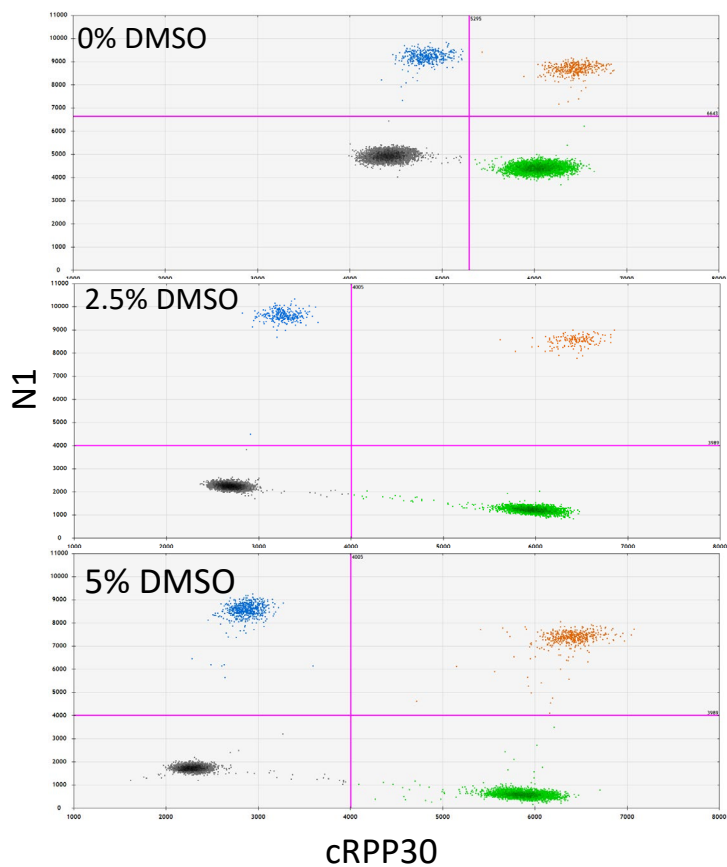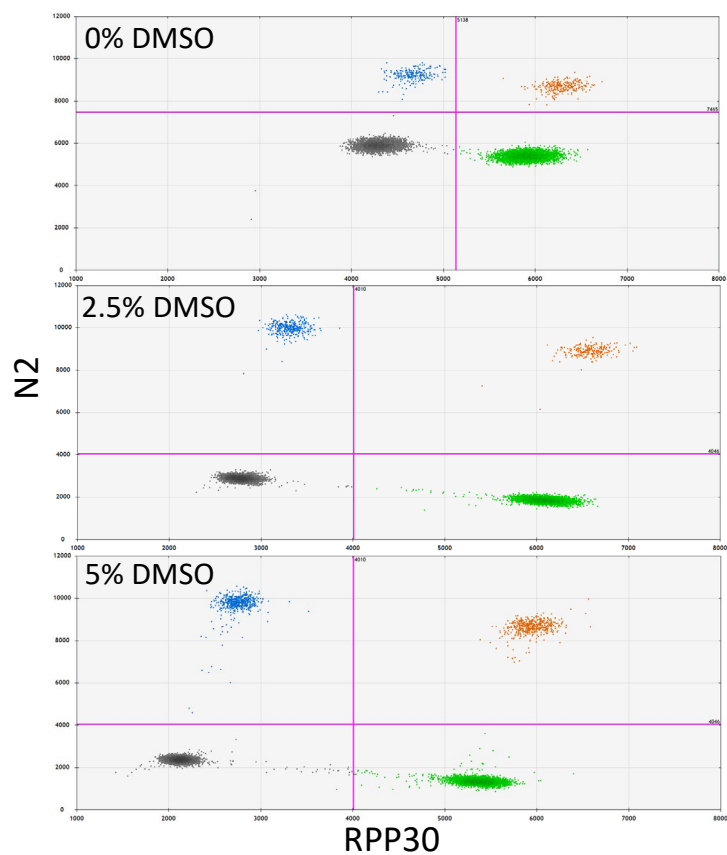

**Figure S1.** DMSO decreases negative droplet intensity in RT-ddPCR assays, related to Figures 1, 2, 4 & 5. The RT-ddPCR reactions containing 0%, 2.5%, or 5% DMSO were performed for a Chelex-lowTE sample prepared with the ATCC SARS-CoV-2 virions and 293FT cells using N1 and cRPP30 (left panel) or N2 and RPP30 (right panel). The grey clusters represent negative droplets; blue and green clusters represent Fam and Hex positive droplets, respectively; and orange clusters represent double positive droplets.

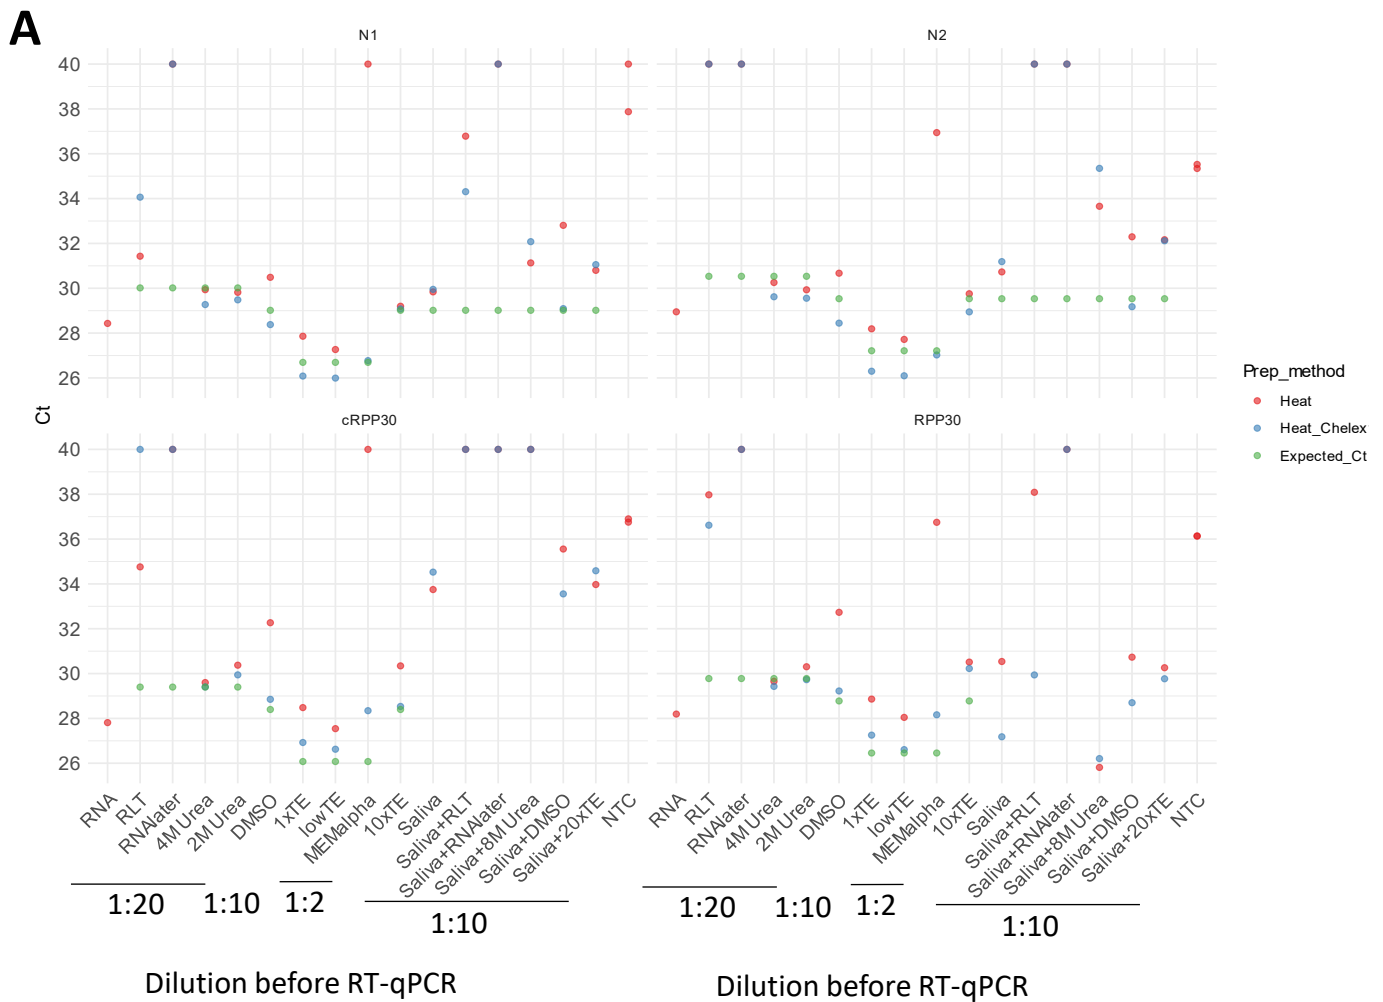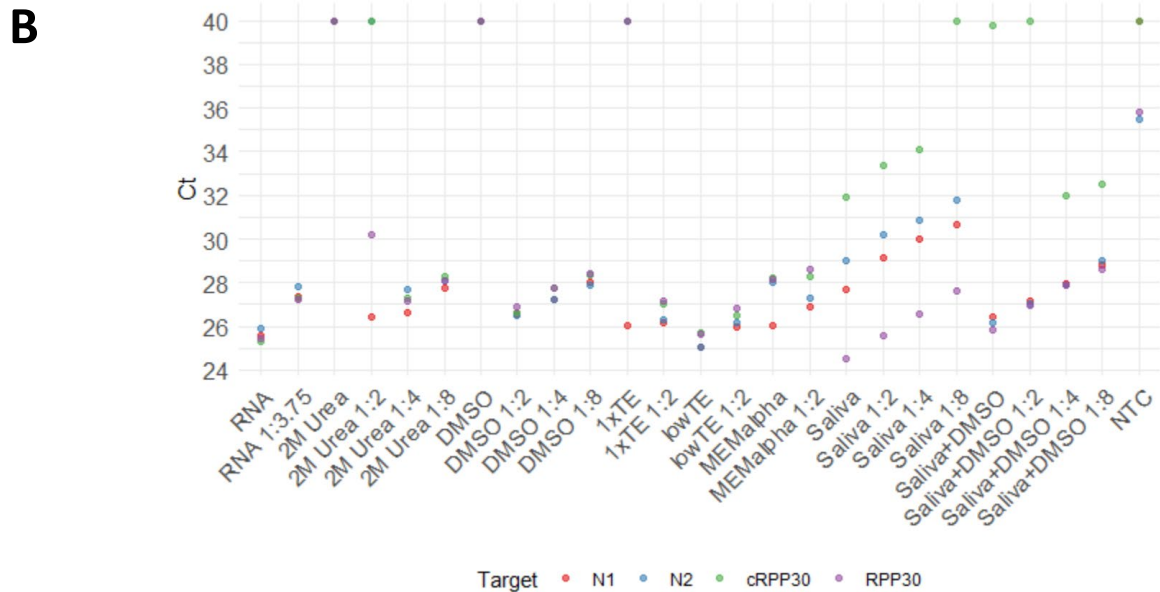

**Figure S2.** SARS-CoV-2 prepared in different buffers used for RT-qPCR without RNA-extraction, related to Figure 2. **(A)** Samples were diluted in H<sub>2</sub>O as indicated at the bottom. Expected\_Ct refers to Ct calculated based on Ct from extracted RNA normalized with added virion numbers after dilution using the  $\Delta$ Ct method. **(B)** Buffer compatibility in RT-qPCR. Sample RNA, not heated and 5  $\mu$ l of which contained materials extracted from 6,250 virions. Other samples were heated in the presence of Chelex, of which undiluted samples also contained 6,250 virions per 5  $\mu$ l. Samples were diluted in H<sub>2</sub>O. Samples with undetermined Ct values were plotted as Ct 40. The NEB Luna RT-qPCR kit and NEB-Luna-Program I was used. NTC, no-template control.

**A**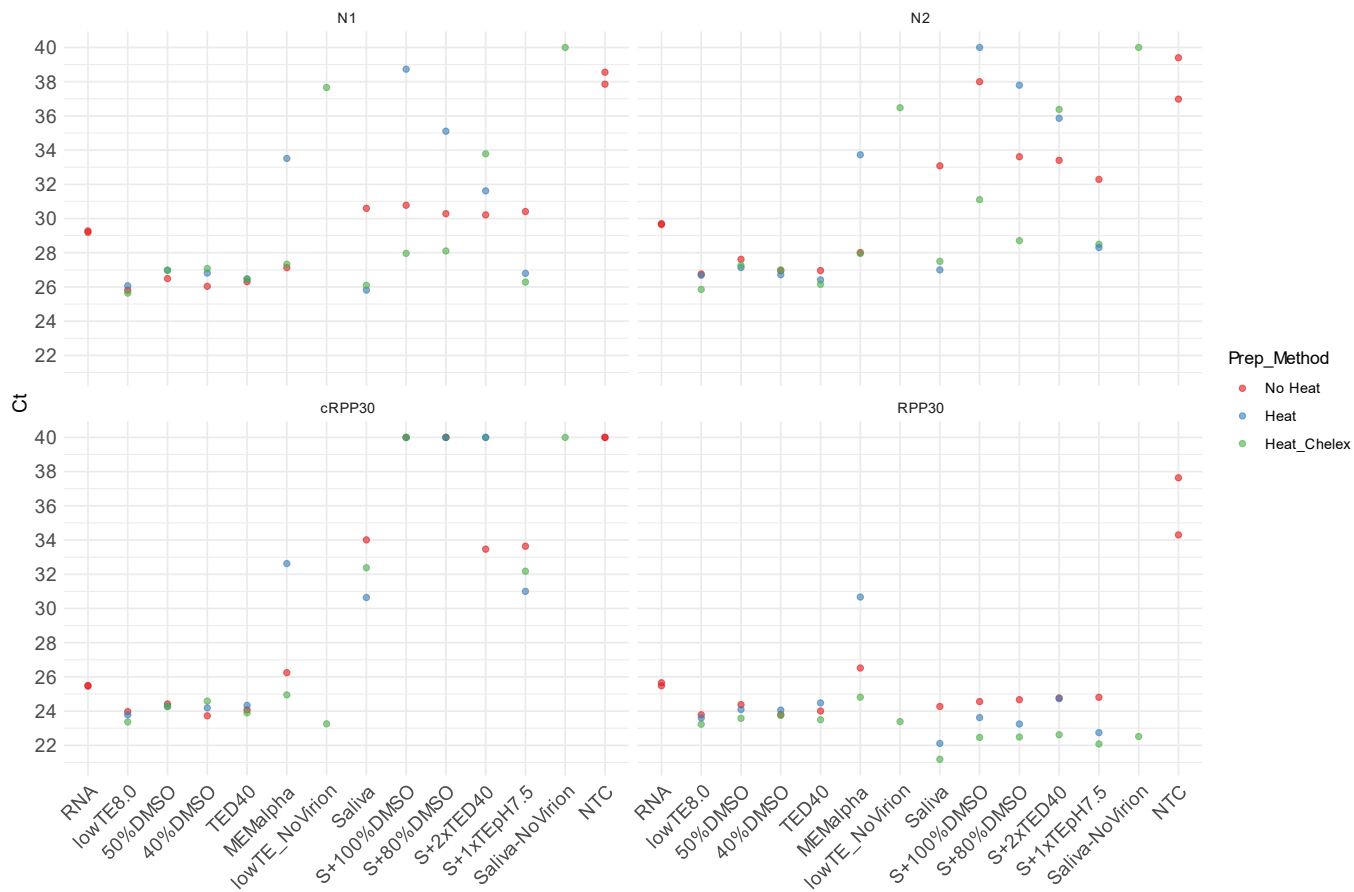**B**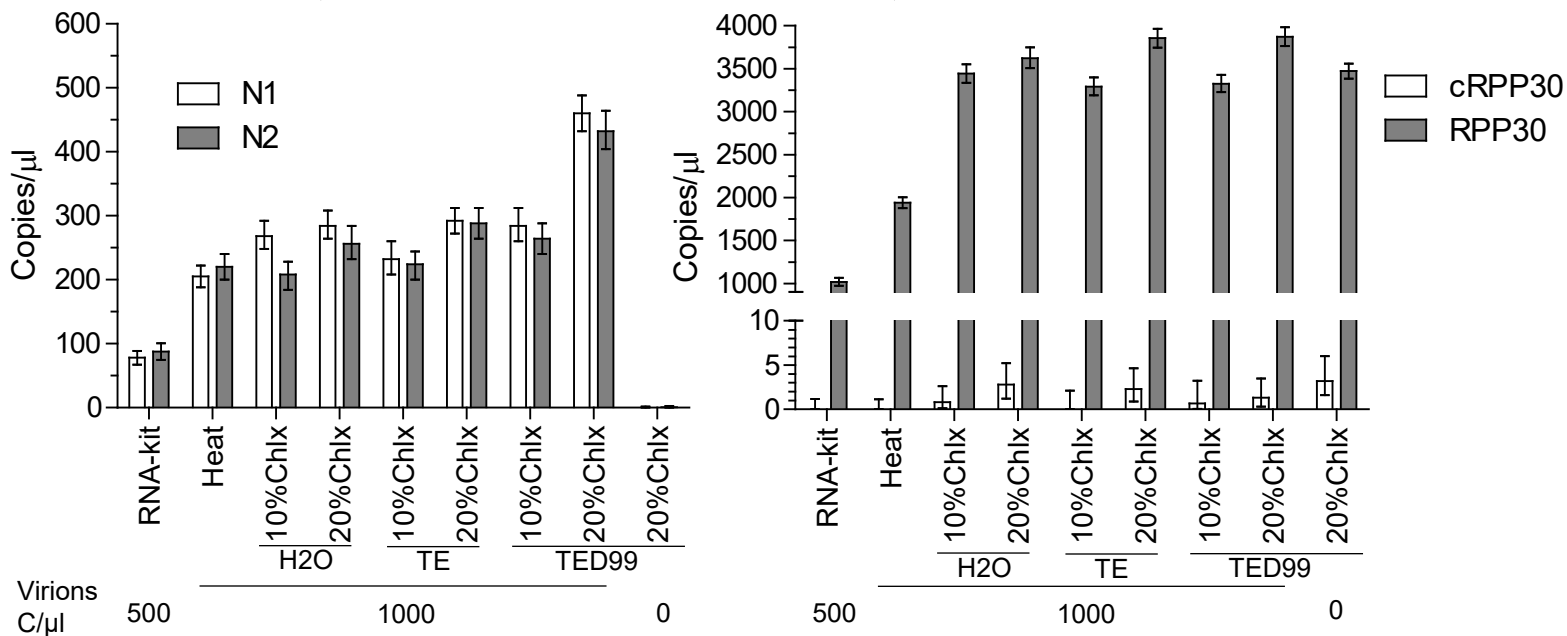

**Figure S3.** Tris EDTA and DMSO containing buffers, related to Figures 3, 4 & 5. **(A)** RT-qPCR of samples with heat-inactivated ATCC SARS-CoV-2 virions. 5  $\mu$ l of samples were used for one reaction in RT-qPCR except that samples in MEM  $\alpha$  were diluted 1:1 with H<sub>2</sub>O. "S+" refers to "Saliva + ". Samples with undetermined Ct values were plotted as Ct 40. The NEB Luna RT-qPCR kit and NEB-Luna-Program I was used. **(B)** RT-ddPCR of saliva samples with heat-inactivated ATCC SARS-CoV-2 virions. The Chelex was prepared in H<sub>2</sub>O, lowTE or TED99 (lowTE with 99% DMSO). RNA-kit refers to RNA extracted with the RNeasy Protect Saliva Mini Kit. NTC, no-template control.

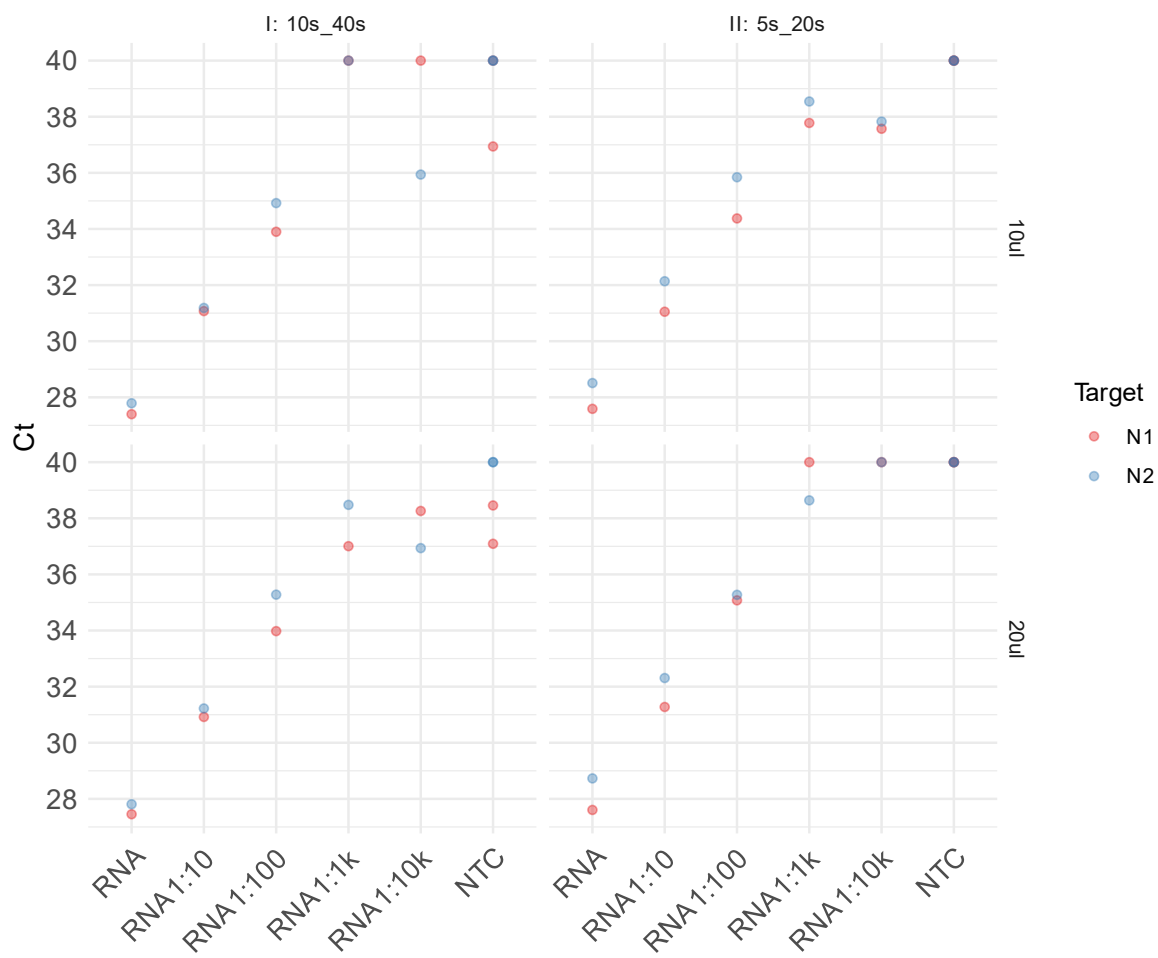

**Figure S4.** Optimization of the NEB Luna RT-qPCR assay, related to Figures 2 & 3. Extracted RNA samples were serially diluted and assayed either using 2.5 µl sample in a 10 µl reaction volume or 5 µl in a 20 µl reaction, and using a longer PCR protocol (I: 10 seconds of denature and 40 seconds of annealing/extension) or a shorter PCR protocol (II: 5 seconds of denature and 20 seconds of annealing/extension). NTC, no-template control.

**Table S1.** Oligonucleotides, related to STAR methods.

| Target         | Oligo name     | Oligo sequence           |
|----------------|----------------|--------------------------|
| 2019-nCoV_N1   | 2019nCoV_N1F   | GACCCCAAAATCAGCGAAAT     |
|                | 2019nCoV_N1R   | TCTGGTTACTGCCAGTTGAATCTG |
|                | 2019nCoV_N1Fam | ACCCCGCATTACGTTTGGTGGACC |
| 2019-nCoV_N2   | 2019nCoV_N2F   | TTACAAACATTGGCCGCAAA     |
|                | 2019nCoV_N2R   | GCGCGACATTCCGAAGAA       |
|                | 2019nCoV_N2Fam | ACAATTTGCCCCCAGCGCTTCAG  |
| RPP30 (aka RP) | RPP30F         | AGATTTGGACCTGCGAGCG      |
|                | RPP30R         | GAGCGGCTGTCTCCACAAGT     |
|                | RPP30Hex       | TTCTGACCTGAAGGCTCTGCGCG  |
| cRPP30         | RPP30F         | See above                |
|                | RPP30cR        | GCAACAACCTGAATAGCCAagGT  |
|                | RPP30Hex       | See above                |
| chr5UC         | chr5UC-F       | ATTTATGACCAGCCACAGCC     |
|                | chr5UC-R       | CCATCAGGGACTTGGTTTCA     |
|                | chr5UC-Hex     | CAACTCCAGCAGCTGCACACCGC  |
